# Supplementary material
Source: publisher figshare collection journal article supplement (https://tandf.figshare.com/ndownloader/files/31958256)
Supplement: Supplementary file 1 [file 31958256]

## Sheet: Watson River discharge
Reconstruction of Watson River annual discharge values by Dirk van As, Geological Survey of Denmark and Greenland (GEUS)
Van As D, Hasholt B, Ahlstrøm AP, Box JE, Cappelen J, Colgan W, Fausto RS, Mernild SH, Mikkelsen AB, Noël BPY, Petersen D and Van den Broeke MR (2018) Reconstructing Greenland ice sheet meltwater discharge through the Watson River (1949-2017). Arctic, Antarctic, and Alpine Research.
Year	Discharge (km3)	Uncertainty (km3)	Method
1949	4.15	1.16	Kangerlussuaq air temperature
1950	4.43	1.18	Kangerlussuaq air temperature
1951	-999	-999	x
1952	4.58	1.2	Kangerlussuaq air temperature
1953	5.02	1.24	Kangerlussuaq air temperature
1954	3.5	1.1	Kangerlussuaq air temperature
1955	2.94	1.06	Kangerlussuaq air temperature
1956	3.36	1.09	Kangerlussuaq air temperature
1957	5.5	1.29	Kangerlussuaq air temperature
1958	5.09	1.25	Kangerlussuaq air temperature
1959	4.49	1.19	Kangerlussuaq air temperature
1960	6.49	1.41	Kangerlussuaq air temperature
1961	4.27	1.17	Kangerlussuaq air temperature
1962	4.99	1.24	Kangerlussuaq air temperature
1963	3.32	1.09	Kangerlussuaq air temperature
1964	3.09	1.07	Kangerlussuaq air temperature
1965	4.43	1.18	Kangerlussuaq air temperature
1966	3.69	1.12	Kangerlussuaq air temperature
1967	2.25	1.01	Kangerlussuaq air temperature
1968	7.13	1.48	Kangerlussuaq air temperature
1969	3.76	1.12	Kangerlussuaq air temperature
1970	2.41	1.02	Kangerlussuaq air temperature
1971	-999	-999	x
1972	-999	-999	x
1973	-999	-999	x
1974	7.55	1.6	Kangerlussuaq air temperature
1975	5.75	1.4	Kangerlussuaq air temperature
1976	3.98	0.85	Tasersiaq discharge
1977	4.9	0.96	Tasersiaq discharge
1978	4.36	0.9	Tasersiaq discharge
1979	2.8	1.14	Kangerlussuaq air temperature
1980	5.25	1.35	Kangerlussuaq air temperature
1981	4.3	0.89	Tasersiaq discharge
1982	3.44	0.79	Tasersiaq discharge
1983	2.23	0.67	Tasersiaq discharge
1984	3.78	0.82	Tasersiaq discharge
1985	5.12	0.99	Tasersiaq discharge
1986	4.02	1.23	Kangerlussuaq air temperature
1987	5.23	1.01	Tasersiaq discharge
1988	4.64	0.93	Tasersiaq discharge
1989	4.9	0.96	Tasersiaq discharge
1990	5.61	1.06	Tasersiaq discharge
1991	5.86	1.09	Tasersiaq discharge
1992	2.42	0.68	Tasersiaq discharge
1993	4.29	1.26	Kangerlussuaq air temperature
1994	3.77	1.21	Kangerlussuaq air temperature
1995	5.88	1.1	Tasersiaq discharge
1996	2.99	0.74	Tasersiaq discharge
1997	4.72	0.94	Tasersiaq discharge
1998	5.94	1.1	Tasersiaq discharge
1999	5.52	1.05	Tasersiaq discharge
2000	5.69	1.07	Tasersiaq discharge
2001	5.27	1.01	Tasersiaq discharge
2002	4.7	0.94	Tasersiaq discharge
2003	7.96	1.39	Tasersiaq discharge
2004	5.97	1.11	Tasersiaq discharge
2005	5.16	1.34	Kangerlussuaq air temperature
2006	5.41	2.85	Watson River discharge
2007	7.51	1.19	Watson River discharge
2008	5.46	0.89	Watson River discharge
2009	4.87	0.87	Watson River discharge
2010	11.24	1.73	Watson River discharge
2011	7.77	1.17	Watson River discharge
2012	10.73	1.63	Watson River discharge
2013	4.32	0.67	Watson River discharge
2014	6.76	1.03	Watson River discharge
2015	3.79	0.58	Watson River discharge
2016	8.21	1.28	Watson River discharge
2017	4.28	0.65	Watson River discharge
